# Supplementary material
Source: Elsevier journal article supplement (https://www.sciencedirect.com/science/article/pii/S1885585716302195)

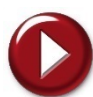

## Supplementary material

# Improvement in Risk Stratification in Transcatheter Aortic Valve Implantation Using a Combination of the Tumor Marker CA125 and the Logistic EuroSCORE

**Table 1 of the supplementary material**

Baseline Characteristics for the Entire Population and According to All-cause Mortality

| Variables                                     | CA125 determined |                | P-value |
|-----------------------------------------------|------------------|----------------|---------|
|                                               | no<br>n = 90     | yes<br>n = 422 |         |
| Age (y)                                       | 79 ± 5           | 79 ± 6         | .861    |
| Male sex, n (%)                               | 47 (52)          | 200 (47)       | .405    |
| Logistic EuroSCORE (%)                        | 14 [8-20]        | 14 [9-22]      | .362    |
| Non-TF access                                 | 45 (50)          | 185 (44)       | .286    |
| Self-expandable/Balloon-expandable THV, n (%) | 43 (48)          | 173 (41)       | .231    |
| Body mass index, kg/m <sup>2</sup>            | 28 ± 5           | 27 ± 4         | .028    |
| Diabetes, n (%)                               | 34 (38)          | 134 (32)       | .269    |
| Hypertension, n (%)                           | 73 (81)          | 304 (72)       | .076    |
| Atrial fibrillation, n (%)                    | 30 (33)          | 142 (34)       | .954    |
| Previous SAVR, n (%)                          | 2 (2)            | 9 (2)          | .958    |
| Previous CABG, n (%)                          | 9 (10)           | 54 (13)        | .463    |
| Previous CAD, n (%)                           | 38 (42)          | 166 (39)       | .612    |
| Previous PCI, n (%)                           | 31 (34)          | 109 (26)       | .096    |
| Previous malignoma, n (%)                     | 12 (13)          | 65 (15)        | .618    |
| Previous MI, n (%)                            | 9 (10)           | 38 (9)         | .767    |
| <sup>a</sup> Previous stroke, n (%)           | 7 (8)            | 49 (12)        | .290    |
| <sup>b</sup> Renal failure, n (%)             | 34 (38)          | 148 (35)       | .626    |
| <sup>c</sup> COPD, n (%)                      | 12 (13)          | 57 (14)        | .965    |
| Peripheral arterial disease, n (%)            | 14 (16)          | 58 (14)        | .654    |
| Pacemaker, n (%)                              | 3 (3)            | 40 (10)        | .056    |
| Previous dialysis, n (%)                      | 2 (2)            | 20 (5)         | .285    |
| NYHA III/IV, n (%)                            | 80 (89)          | 352 (83)       | .194    |
| Creatinine (mg/dL)                            | 1.27 ± 0.90      | 1.38 ± 1.10    | .349    |
| LVEF ≤ 35%, n (%)                             | 10 (11)          | 31 (7)         | .235    |

|                                    |         |         |      |
|------------------------------------|---------|---------|------|
| Maximal gradient, mmHg             | 73 ± 22 | 78 ± 25 | .116 |
| <sup>d</sup> PAH, n (%)            | 3 (10)  | 28 (7)  | .233 |
| Aortic valve area, cm <sup>2</sup> | 0.72    | 0.71    | .481 |

CA125, tumor marker carbohydrate antigen 125; CABG, coronary artery bypass graft; CAD, coronary artery disease; COPD, chronic obstructive pulmonary disease; LVEF, left ventricular ejection fraction; MI, myocardial infarction; NYHA, New York Heart Association; PAH, pulmonary arterial hypertension; PCI, percutaneous coronary intervention; SAVR, surgical aortic valve replacement; TF, transfemoral; THV, transcatheter heart valve.

<sup>a</sup>Severely affecting ambulation or day-to-day functioning.

<sup>b</sup>Serum creatinine > 200 µmol/L.

<sup>c</sup>On long-term use of bronchodilators or steroids.

<sup>d</sup>Pulmonary artery pressure ≥ 60mmHg.

Unless otherwise indicated, values are presented as mean ± standard deviation or as the median [interquartile range].

**Table 2 of the supplementary material**

Reclassification Among Patients Who Experienced an Event and Those not Experiencing An Event During Follow-up

| Reclassification among patients who experience an event and those not experiencing an event during follow-up |                  |       |       |
|--------------------------------------------------------------------------------------------------------------|------------------|-------|-------|
| Model without CA125                                                                                          | Model with CA125 |       |       |
| Frequency (row per cent)                                                                                     | 0-27%            | > 27% | Total |
| <i>Patients who experienced an event</i>                                                                     |                  |       |       |
| 0-27%                                                                                                        | 30               | 16    | 46    |
| > 27%                                                                                                        | 13               | 56    | 69    |
| Total                                                                                                        | 43               | 72    | 115   |
| <i>Patients not experiencing an event</i>                                                                    |                  |       |       |
| 0-27%                                                                                                        | 185              | 21    | 206   |
| > 27%                                                                                                        | 36               | 65    | 101   |
| Total                                                                                                        | 221              | 86    | 307   |

CA125, tumor marker carbohydrate antigen 125.

**Figure of the supplementary material:** Cumulative mortality during follow-up according to the acquisition of CA125.

CA125, tumor marker carbohydrate antigen 125.

**Supplemental Figure 1 –Mortality According to available baseline CA125 measurments**

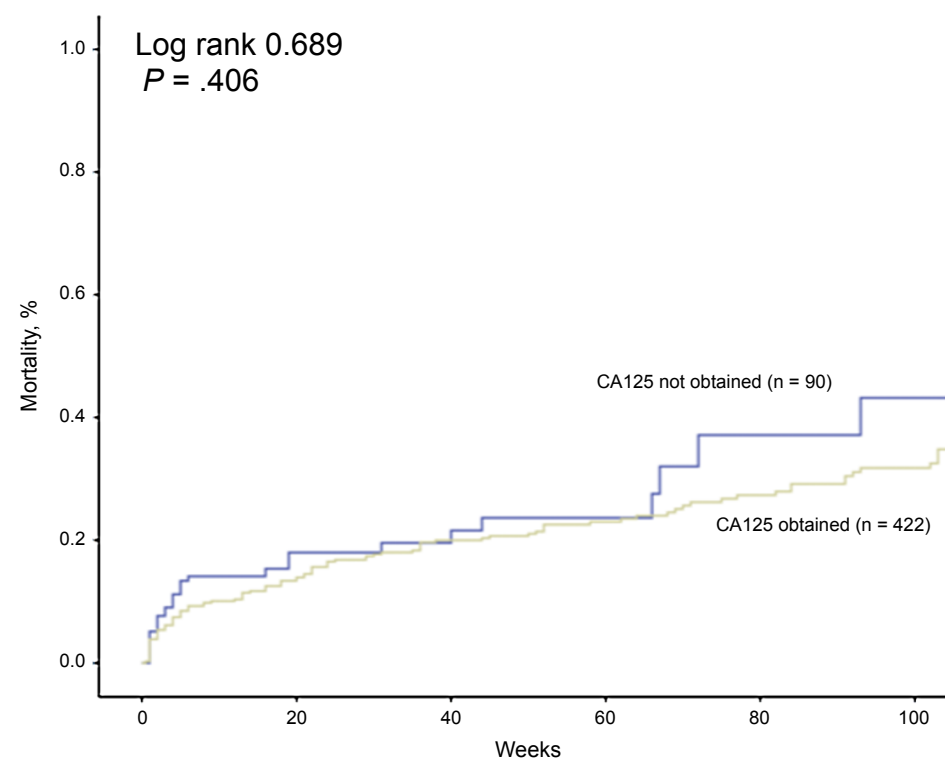

Supplement: mmc1 [file S1885585716302195:mmc1.pdf]
